# Supplementary material for: A cohort study of the occurrence of post-term births and its association with perinatal mortality in a rural area in Bangladesh
Source: PubMed Central journal article supplement (PMC11565093; doi:10.7189/jogh.14.04238), 2024-11-15

## Online Supplementary Document

Table S1. Association of covariates (maternal age, maternal education, parity, and birth year) with perinatal death in the pregnancy cohorts in Matlab, Bangladesh (n=72373)

|                      | Unadjusted       |         | Adjusted*        |         |
|----------------------|------------------|---------|------------------|---------|
|                      | RR (95% CI)      | P-value | aRR (95% CI)     | P-value |
| Maternal age (years) |                  |         |                  |         |
| <20                  | 1.13 (1.02-1.25) | 0.018   | 1.12 (1.01-1.24) | 0.025   |
| 20-24                | 1.00             |         | 1.00             |         |
| 25-29                | 0.90 (0.82-1.00) | 0.050   | 0.90 (0.82-1.00) | 0.047   |
| ≥30                  | 1.20 (1.09-1.33) | <0.001  | 1.12 (1.02-1.24) | 0.020   |
| Education (years)    |                  |         |                  |         |
| 0                    | 2.25 (1.79-2.82) | <0.001  | 1.70 (1.36-2.14) | <0.001  |
| 1-5                  | 1.60 (1.27-2.02) | <0.001  | 1.31 (1.04-1.65) | 0.022   |
| 6-10                 | 1.29 (1.02-1.62) | 0.030   | 1.19 (0.95-1.49) | 0.127   |
| ≥11                  | 1.00             |         | 1.00             |         |
| Parity               |                  |         |                  |         |
| 0                    | 2.01 (1.84-2.19) | <0.001  | 2.18 (2.00-2.38) | <0.001  |
| 1                    | 0.88 (0.79-1.00) | 0.028   | 0.97 (0.86-1.07) | 0.534   |
| ≥2                   | 1.00             |         | 1.00             |         |
| Birth year           |                  |         |                  |         |
| 1990-1999            | 2.22 (2.01-2.44) | <0.001  | 1.71 (1.54-1.89) | <0.001  |
| 2000-2009            | 1.70 (1.53-1.88) | <0.001  | 1.50 (1.36-1.67) | <0.001  |
| 2010-2019            | 1.00             |         | 1.00             |         |

RR – relative risk, aRR – adjusted relative risk, CI – confidence interval.

\*adjusted for gestation weeks at birth.

Table S2. Relative risk of perinatal death by each gestation week in Matlab, Bangladesh

|                        | Unadjusted RR<br>(95% CI) | <i>P</i> -value | Adjusted RR*<br>(95% CI) | <i>P</i> -value |
|------------------------|---------------------------|-----------------|--------------------------|-----------------|
| GA (weeks) at delivery |                           |                 |                          |                 |
| 37 vs 39 (Ref 39)      | 1.49 (1.27-1.75)          | 0.000           | 1.44 (1.23-1.69)         | 0.000           |
| 38 vs 39 (Ref 39)      | 0.98 (0.84-1.15)          | 0.842           | 0.98 (0.83-1.14)         | 0.756           |
| 40 vs 39 (Ref 39)      | 1.06 (0.91-1.24)          | 0.417           | 1.06 (0.92-1.24)         | 0.420           |
| 41 vs 39 (Ref 39)      | 1.50 (1.27-1.77)          | 0.000           | 1.44 (1.22-1.69)         | 0.000           |
| 42 vs 39 (Ref 39)      | 2.12 (1.73-2.61)          | 0.000           | 1.81 (1.47-2.22)         | 0.000           |
| 43 vs 39 (Ref 39)      | 2.16 (1.62-2.88)          | 0.000           | 1.93 (1.45-2.57)         | 0.000           |
| 44 vs 39 (Ref 39)      | 2.39 (1.63-3.51)          | 0.000           | 2.33 (1.60-3.41)         | 0.000           |

RR – relative risk, CI – confidence interval.

\*adjusted for maternal age, education, parity, and birth year.

Table S3. Perinatal death risks stratified by three study periods by year from 1990 to 2019 in Matlab, Bangladesh

| Gestation weeks at birth | 1990-1999             |                   |                       | 2000-2009             |                   |                       | 2010-2019             |                   |                       |
|--------------------------|-----------------------|-------------------|-----------------------|-----------------------|-------------------|-----------------------|-----------------------|-------------------|-----------------------|
|                          | Perinatal death n (%) | Crude RR (95% CI) | Adjusted RR* (95% CI) | Perinatal death n (%) | Crude RR (95% CI) | Adjusted RR* (95% CI) | Perinatal death n (%) | Crude RR (95% CI) | Adjusted RR* (95% CI) |
| Pre-term (<37)           | 588 (47.3)            | 2.87 (2.49-3.31)  | 2.79 (2.42-3.22)      | 365 (37.3)            | 3.66 (3.12-4.29)  | 3.59 (3.05-4.22)      | 250 (44.0)            | 6.47 (5.32-7.86)  | 6.29 (5.17-7.66)      |
| Early-term (37-38)       | 224 (18.0)            | 1.07 (0.90-1.28)  | 1.08 (0.91-1.28)      | 190 (19.4)            | 1.22 (1.01-1.48)  | 1.26 (1.05-1.52)      | 99 (17.4)             | 0.99 (0.77-1.27)  | 1.04 (0.81-1.34)      |
| Full-term (39-40)        | 257 (20.7)            | 1                 | 1                     | 236 (24.1)            | 1                 | 1                     | 158 (27.8)            | 1                 | 1                     |
| Late-term (41)           | 93 (7.5)              | 1.47 (1.17-1.86)  | 1.46 (1.16-1.83)      | 92 (9.4)              | 1.40 (1.11-1.78)  | 1.35 (1.06-1.70)      | 42 (7.4)              | 1.32 (0.94-1.85)  | 1.31 (0.93-1.83)      |
| Post-term (42-44)        | 80 (6.4)              | 1.64 (1.28-2.10)  | 1.66 (1.30-2.11)      | 96 (9.8)              | 2.19 (1.73-2.76)  | 2.12 (1.69-2.67)      | 19 (3.4)              | 1.68 (1.05-2.68)  | 1.67 (1.05-2.67)      |

RR – relative risk, CI – confidence interval.

\*adjusted for maternal age, education, and parity.

Table S4. Risk of perinatal deaths stratified by delivery types by year from 2005 to 2019 in Matlab, Bangladesh

|                          | Vaginal delivery |                   |                       | Caesarean delivery |                   |                       |
|--------------------------|------------------|-------------------|-----------------------|--------------------|-------------------|-----------------------|
|                          | N                | Crude RR (95% CI) | Adjusted RR* (95% CI) | N                  | Crude RR (95% CI) | Adjusted RR* (95% CI) |
| Gestation weeks at birth |                  |                   |                       |                    |                   |                       |
| Pre-term (<37)           | 3076             | 5.65 (4.74-6.73)  | 5.18 (4.34-6.18)      | 1328               | 5.06 (3.66-7.01)  | 4.91 (3.52-6.86)      |
| Early-term (37-38)       | 6670             | 1.19 (0.96-1.48)  | 1.20 (0.97-1.48)      | 3528               | 0.94 (0.64-1.39)  | 0.96 (0.64-1.44)      |
| Full-term (39-40)        | 11543            | 1.00              | 1.00                  | 4561               | 1.00              | 1.00                  |
| Late-term (41)           | 2591             | 1.40 (1.05-1.85)  | 1.37 (1.03-1.82)      | 1139               | 1.70 (1.07-2.70)  | 1.69 (1.06-2.69)      |
| Post-term (42-44)        | 1254             | 2.37 (1.75-3.21)  | 2.30 (1.71-3.10)      | 432                | 2.14 (1.16-3.96)  | 2.11 (1.15-3.90)      |

RR – relative risk, CI – confidence interval.

\*adjusted for maternal age, maternal education, and parity.

Table S5. Population-attributable fraction (PAF) of perinatal death stratified by gestation weeks at birth by year from 1990 to 2019 in Matlab, Bangladesh

|                          | Birth years      |    |                 |                  |    |                  |                  |    |                |                  |    |                  |
|--------------------------|------------------|----|-----------------|------------------|----|------------------|------------------|----|----------------|------------------|----|------------------|
|                          | 1990-1999        |    |                 | 2000-2009        |    |                  | 2010-2019        |    |                | All              |    |                  |
|                          | n=11218          |    |                 | n=14082          |    |                  | n=14262          |    |                | n=39562          |    |                  |
| Gestation weeks at birth | RR* (95% CI)     | P  | PAF (95% CI)    | RR† (95% CI)     | P  | PAF (95% CI)     | RR‡ (95% CI)     | P  | PAF (95% CI)   | RR§ (95% CI)     | P  | PAF (95% CI)     |
| 41-44 weeks              | 1.53 (1.27-1.85) | 30 | 13.7(12.1-15.3) | 1.64 (1.36-1.98) | 32 | 17.0 (15.8-18.2) | 1.41 (1.05-1.90) | 21 | 7.9 (6.3-9.56) | 1.63 (1.45-1.84) | 28 | 15.0 (14.3-15.7) |
| 39-40 weeks              | 1.00             | 70 |                 | 1.00             | 68 |                  | 1.00             | 79 |                | 1.00             | 72 |                  |

RR – relative risk, P – Prevalence is provided as percent, CI – confidence interval.

\*adjusted for women’s age, women’s education, and parity.

†adjusted for women’s age, women’s education, and parity.

‡adjusted for women’s age, women’s education, and parity.

§adjusted for women’s age, women’s education, and parity.

Figure S1. Distribution of pre-term (<37 weeks), early-term (37+0/7 to 38+6/7 weeks), full-term (39+0/7 to 40+6/7 weeks), late-term (41+0/7 to 41+6/7 weeks), and post-term (42+0/7 to 44+6/7 weeks) births by caesarean delivery from 2005-2019.

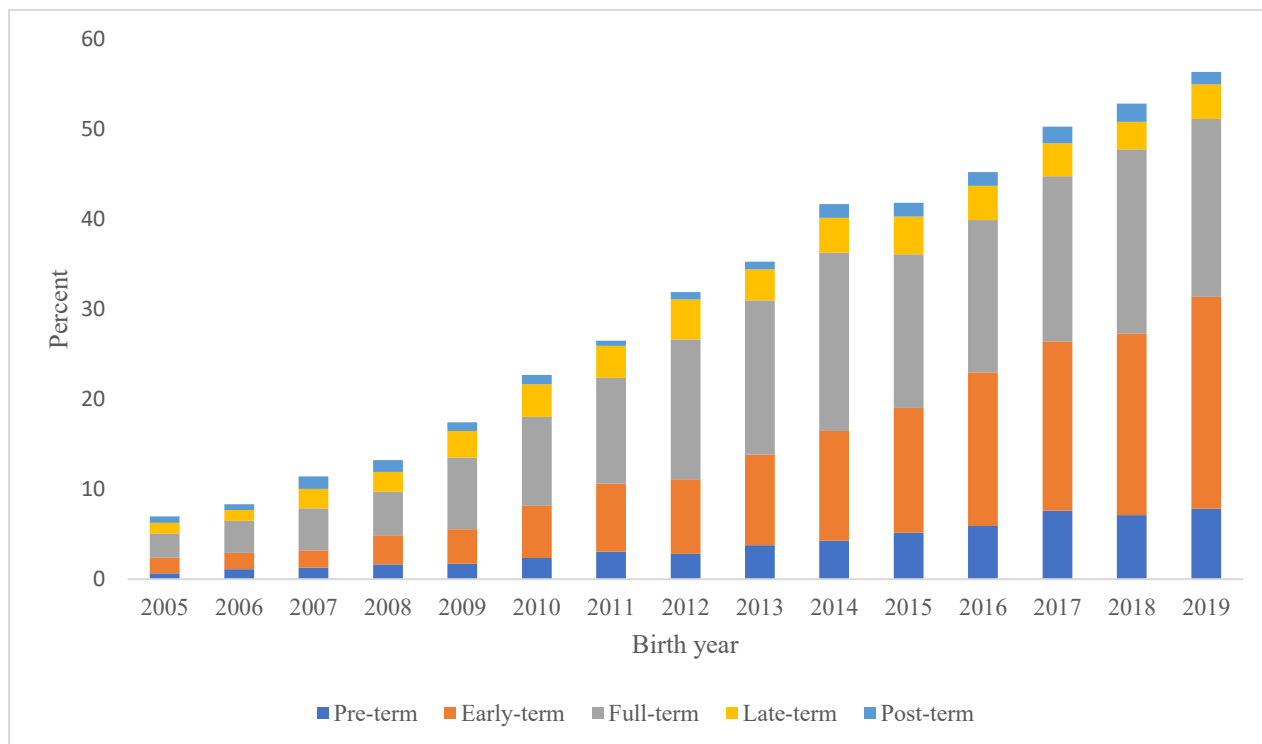

Supplement: jogh-14-04238-s001.pdf [file jogh-14-04238-s001.pdf]
